# Supplementary material for: Clarifying the lithium storage behavior of MoS2 with in situ electrochemical impedance spectroscopy
Source: Royal Society of Chemistry journal article supplement (doi:10.1039/d1ta02517a), 2021-01-01
Supplement: d1ta02517a1.pdf [file d1ta02517a1.pdf]

1

## Supporting Information

2

3 Clarifying the lithium storage behavior of MoS<sub>2</sub> with in situ electrochemical impedance  
4 spectroscopy

5

6 Chao Deng, Hongquan Wang, Shengping Wang\*

7 Faculty of Materials Science and Chemistry, China University of Geosciences, Wuhan 430074, China

8 \* Email: spwang@cug.edu.cn

9

10

11

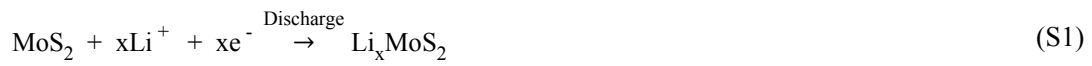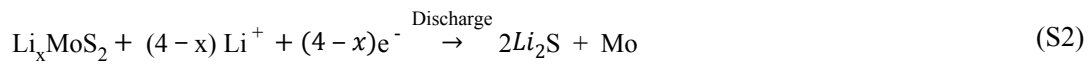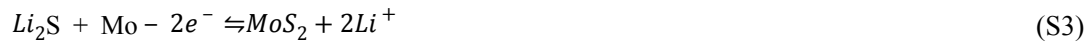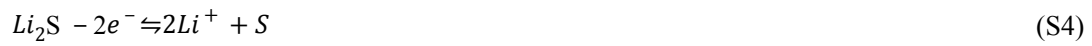

12

13 During the discharging process, lithium ions are intercalated into the interlayer of MoS<sub>2</sub> to form  
14 Li<sub>x</sub>MoS<sub>2</sub> (Formula S1). [1,2] Then, Li<sub>x</sub>MoS<sub>2</sub> slowly transforms to metallic Mo and Li<sub>2</sub>S when  
15 discharged to 0.01 V (vs. Li/Li<sup>+</sup>) (Formula S2). [3,4] Some researchers believe that when recharged  
16 to 3.0 V (vs. Li/Li<sup>+</sup>), Li<sub>2</sub>S reacts with metallic Mo and continues to form MoS<sub>2</sub>, which is the  
17 conversion between MoS<sub>2</sub> and metallic Mo in the later cycles (Formula S3). [5] Other researchers  
18 have believed that Li<sub>2</sub>S is oxidized to elemental sulfur in the charging process, and metallic Mo no  
19 longer stores lithium as an active material. [6-9] Therefore, a conversion reaction occurs between  
20 sulfur and Li<sub>2</sub>S, similar to the reaction mechanism of lithium-sulfur batteries (Formula S4). [10]

21

22

```

23
24 Program S1: Program of batch-fitting EIS data
25 from impedance import preprocessing
26 from impedance.models.circuits import CustomCircuit
27 from impedance.visualization import plot_nyquist
28 import numpy as np
29
30 def readtxt(filename):
31     with open(filename, 'r') as input_file:
32         lines = input_file.readlines()
33         start_line = 1
34         raw_data = lines[start_line:]
35         f, Z = [], []
36         for line in raw_data:
37             each = line.split('\t')
38             f.append(float(each[0]))
39             Z.append(complex(float(each[1]), float(each[2])))
40         input_file.close()
41         return np.array(f), np.array(Z)
42 path="./ raw_data /" #Create a folder named 'raw_data' in the same level directory, and put the
43 original data into this folder in the form of txt. document after grouping.
44 Fit_data=[]
45 for i in range(1,312):
46     frequencies, Z = readtxt(path+str(i)+'\txt')
47     frequencies, Z = preprocessing.ignoreBelowX(frequencies, Z)
48     circuit = 'R0-p(R1,C1)-p(R2-Wo1,C2)' # Input equivalent circuit
49     initial_guess = [.01, .01, 100, .01, .05, 100, 1]
50     circuit = CustomCircuit(circuit, initial_guess=initial_guess)
51     circuit.fit(frequencies, Z)
52     print(' Serial number :%d %i')
53     print(circuit)
54     Fit_data.append(circuit.parameters_)
55 Result = []
56 f=open('Test_Result.txt','w+')
57 for m in range(len(Fit_data)):
58     jointsFrame = Fit_data[m]
59     f.write("%d"%m)
60     f.write(' ')

```

```
61     Result.append(jointsFrame)
62     for Ji in range(7):
63         strNum =str(jointsFrame[Ji])
64         f.write(strNum)
65         f.write(' ')
66     f.write('\n')
67 f.close()
68
69
```

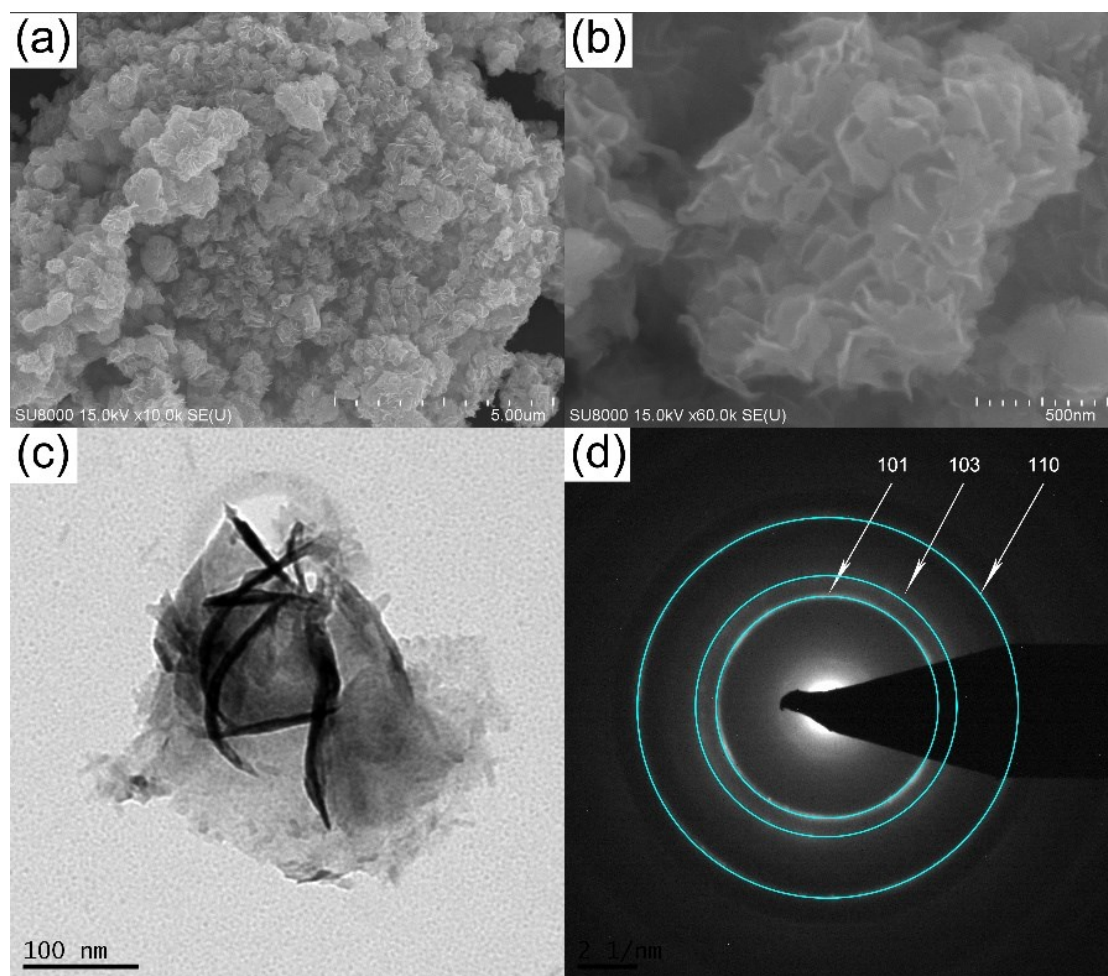

71

72 **Fig. S1** SEM (a, b) and TEM images (c) and polycrystalline electron diffraction pattern (d) of the  
 73 initial MoS<sub>2</sub>.

74

75 The morphology of the initial MoS<sub>2</sub> prepared by the hydrothermal method is illustrated in **Fig.**  
 76 **S1**. MoS<sub>2</sub> had a microsphere structure and aggregated into a block. The individual MoS<sub>2</sub>  
 77 microspheres did not form a complete spherical structure, which was affected by the temperature  
 78 and time of the hydrothermal reaction. <sup>[11]</sup> The single MoS<sub>2</sub> microspheres were composed of MoS<sub>2</sub>  
 79 sheets, which promoted the migration of lithium ions (**Fig. S1b**). <sup>[12]</sup> In addition, the structure also  
 80 increased the contact area of MoS<sub>2</sub> and the electrolyte, thereby increasing the utilization of active  
 81 materials. <sup>[13]</sup> The nanosheet structure of MoS<sub>2</sub> was further demonstrated by TEM. As shown in **Fig.**  
 82 **S1c**, the MoS<sub>2</sub> nanosheets had a lamellar structure. The corresponding selected area electron  
 83 diffraction (SAED) pattern also confirmed the formation of MoS<sub>2</sub> (**Fig. S1d**). The three diffraction  
 84 rings of the SAED pattern could be indexed to the (101), (103), and (110) planes of MoS<sub>2</sub>. <sup>[14]</sup>

85

86

87

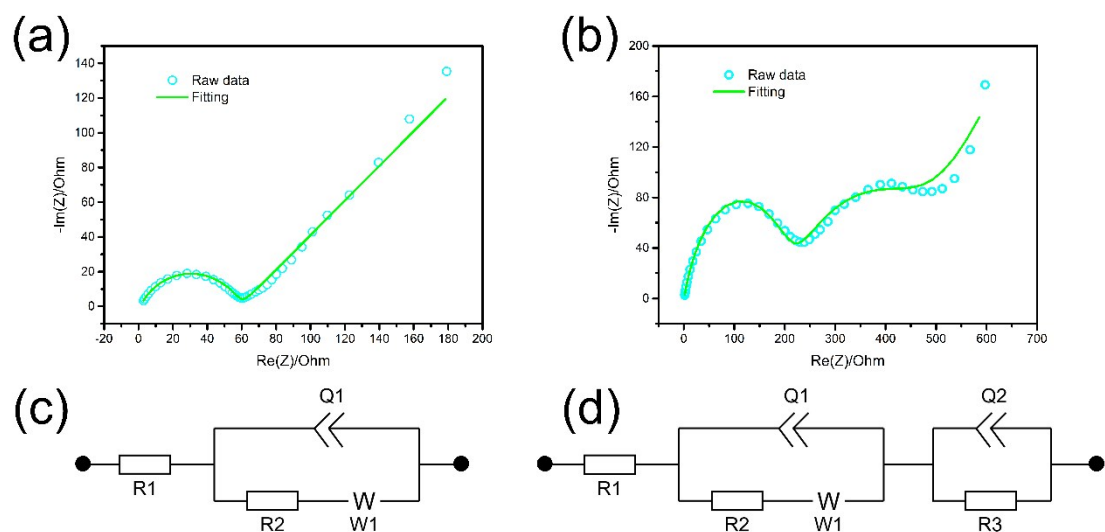

88

89 **Fig. S2** EIS spectra and the corresponding equivalent circuits of MoS<sub>2</sub> at 2.27 V (a, c) and 0.76 V  
90 (b, d) in the first charging process at 0.1 mA cm<sup>-2</sup> from 3.0 V to 0.01 V.

91

92

93

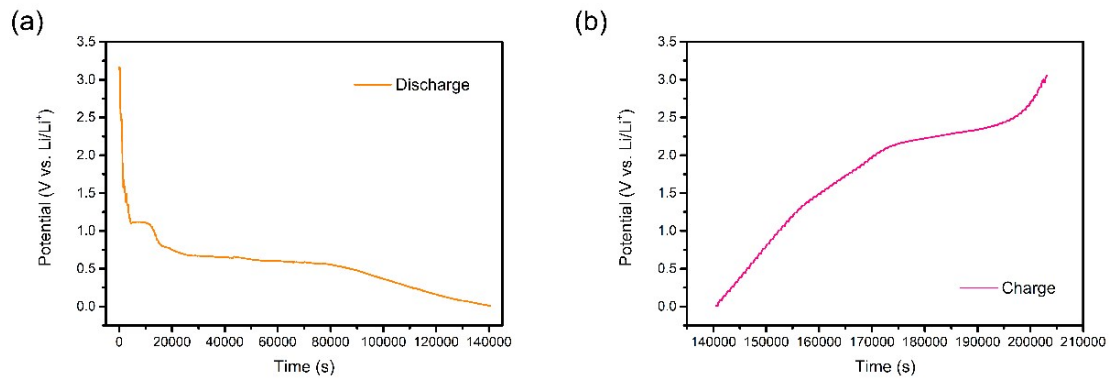

94

95 **Fig. S3** First discharge (a) and charge (b) curves of MoS<sub>2</sub> at 0.1 mA cm<sup>-2</sup> from 3.0-0.01 V with a  
96 step-by-step EIS test.

97

98

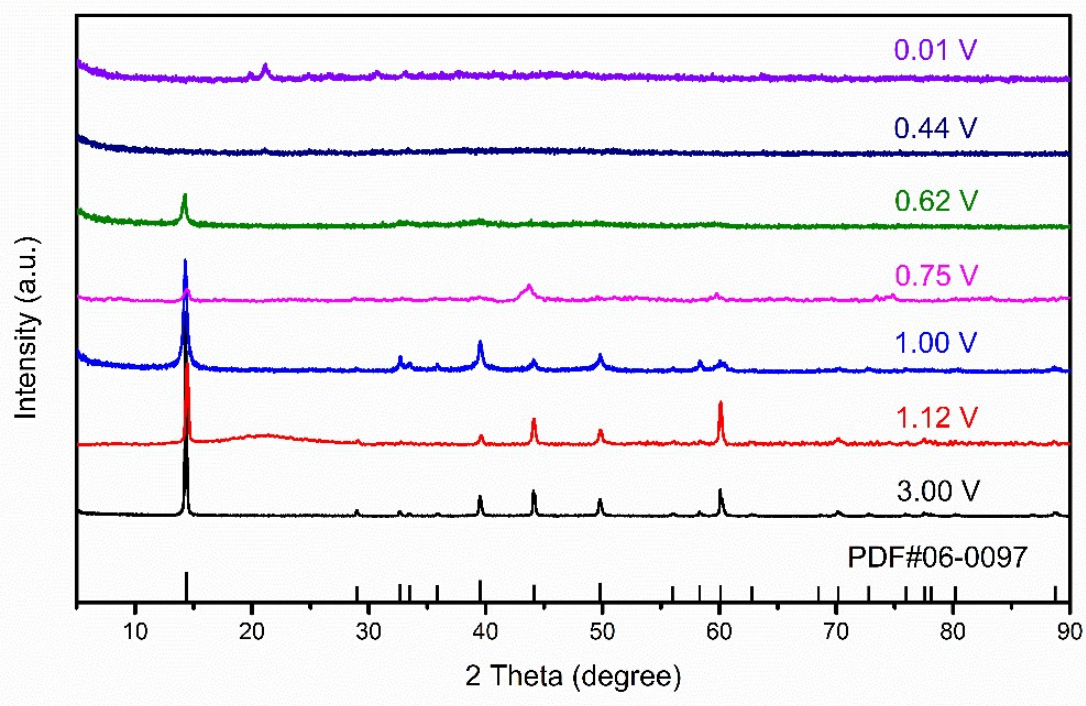

100

101 **Fig. S4** XRD patterns of MoS<sub>2</sub> in the first discharging process at 0.1 mA cm<sup>-2</sup>.

102

103 To determine the reactions that occurred in each potential range, the product of each reaction  
 104 stage needed to be characterized. Based on the phases identified by EIS, the battery was  
 105 decomposed, and XRD was performed at the end of each stage. The result is shown in **Fig. S4**.

106

107 **Stage a: 3.0-1.12 V**

108 Before the EIS test, the MoS<sub>2</sub> electrode was tested by XRD, and the results are shown in **Fig. S4**.  
 109 The initial potential of the MoS<sub>2</sub> electrode without discharging was approximately 3.0 V.  
 110 Comparing the experimental data with the standard card, the diffraction peak of MoS<sub>2</sub> agreed well  
 111 with the standard card (PDF#06-0097), indicating that MoS<sub>2</sub> was successfully synthesized by the  
 112 hydrothermal method. [4] The diffraction peaks at 14.5°, 29°, 39°, and 45° correspond to the (002),  
 113 (004), (103) and (106) planes of MoS<sub>2</sub>, respectively. [15]

114 According to the standard card, the structure of MoS<sub>2</sub> did not change when discharging to 1.12  
 115 V, demonstrating that the structure of MoS<sub>2</sub> was preserved. Additionally, note that the peak at 14.49°  
 116 corresponding to the (002) plane of MoS<sub>2</sub> did not move, indicating that the layer spacing of MoS<sub>2</sub>  
 117 did not change.

118

119 **Stage b: 1.12-1.0 V**

120 As shown in **Fig. 2g**, there was an obvious platform that appeared in this potential range, and in  
 121 the differential capacitance curve, it corresponded to peak 1. Comparing the XRD pattern of the 1.0  
 122 V and 1.12 V samples shown in **Fig. S4**, the XRD pattern did not change greatly, indicating that the



123 layered structure of MoS<sub>2</sub> had not been damaged. Then, the diffraction peak corresponding to the  
124 (002) plane shifted to the left (Fig. S5), suggesting that the interlayer distance of MoS<sub>2</sub> increased.  
125 The reason for this phenomenon was that lithium ions were intercalated between the layers of MoS<sub>2</sub>.  
126 [16,17] In addition, as shown in Fig. 1a, when the charge and discharge window was 1.0-3.0 V, MoS<sub>2</sub>  
127 had better cycle stability, indicating that the intercalation and extraction of lithium ions at this stage  
128 did not cause the structure of MoS<sub>2</sub> to be destroyed. Therefore, the intercalation and extraction of  
129 lithium ions in this potential range were reversible.  
130

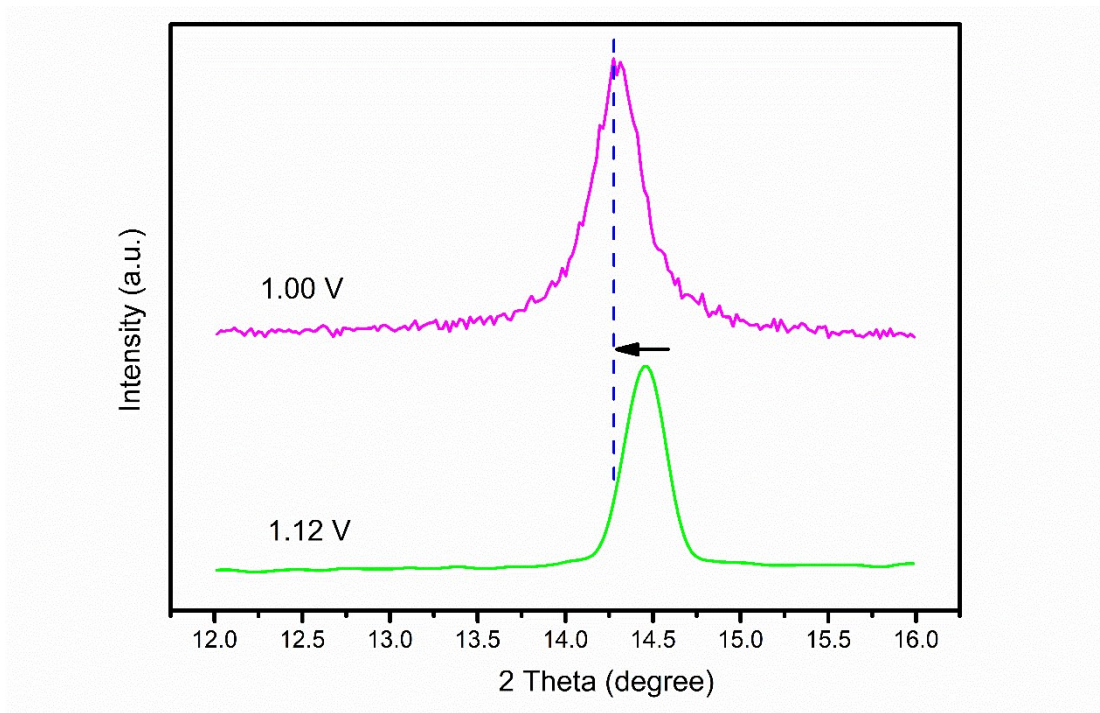

131

132 **Fig. S5** Enlarged view of Fig. S4.

133

#### 134 **Stage c: 1.0-0.75 V**

135 In a previous study, [18] this potential range was always ignored, but it was analyzed by a  
136 differential capacitance curve in this work (Fig. 2g). By analyzing the XRD patterns, the  
137 characteristic peaks of MoS<sub>2</sub> did not completely disappear within this potential range. The  
138 characteristic peaks at 14°, 44°, and 60° were still present, but the peak strengths decreased,  
139 indicating that the structure of MoS<sub>2</sub> changed greatly, but MoS<sub>2</sub> did not completely disappear at this  
140 stage. This may be because the number of MoS<sub>2</sub> particles decreases as lithiation progresses. [6]

141

#### 142 **Stage d: 0.75-0.62 V**

143 As shown in Fig. S4, the diffraction peaks at 44° and 60° completely disappeared in the XRD  
144 pattern from 0.75 V to 0.62 V, but diffraction peaks at 14° were still present, demonstrating that  
145 some MoS<sub>2</sub> had been converted, although some was still present. The electrochemical reaction in  
146 stage d was a conversion reaction. Li<sup>+</sup> continued to enter Li<sub>x</sub>MoS<sub>2</sub>, and Li<sub>x</sub>MoS<sub>2</sub> gradually converted

147 into elemental Mo and  $\text{Li}_2\text{S}$ . [19]

148

149 **Stage e: 0.62-0.44 V**

150 **Fig. S4 shows** that no diffraction peak was detected in the XRD pattern at the end of this period,  
151 suggesting that  $\text{MoS}_2$  was completely converted into elemental Mo and  $\text{Li}_2\text{S}$ . [20] In terms of  $\text{MoS}_2$ ,  
152 when the minimum potential of the charge/discharge window was lower than 0.6 V, the cycle  
153 stability of  $\text{MoS}_2$  was reduced, indicating that the structure of  $\text{MoS}_2$  was destroyed within this range.  
154

155 **Stage f: 0.44-0.01 V**

156 When discharging to 0.01 V, a new diffraction peak appeared in the XRD pattern, which  
157 demonstrated that a new material had been produced at this stage. As shown in **Fig. S6**, the material  
158 corresponding to this  $\text{Li}_2\text{MoO}_4$  diffraction peak (PDF#12-0762) suggests that Mo metal, lithium  
159 salt, and the electrolyte would react and form  $\text{Li}_2\text{MoO}_4$  in the last stage of the reaction. [21] However,  
160 comparing the diffraction peaks of  $\text{Li}_2\text{MoO}_4$  and  $\text{MoS}_2$  shows that the intensities of the  $\text{Li}_2\text{MoO}_4$   
161 peaks are weak, which means that the content of  $\text{Li}_2\text{MoO}_4$  is low.  
162

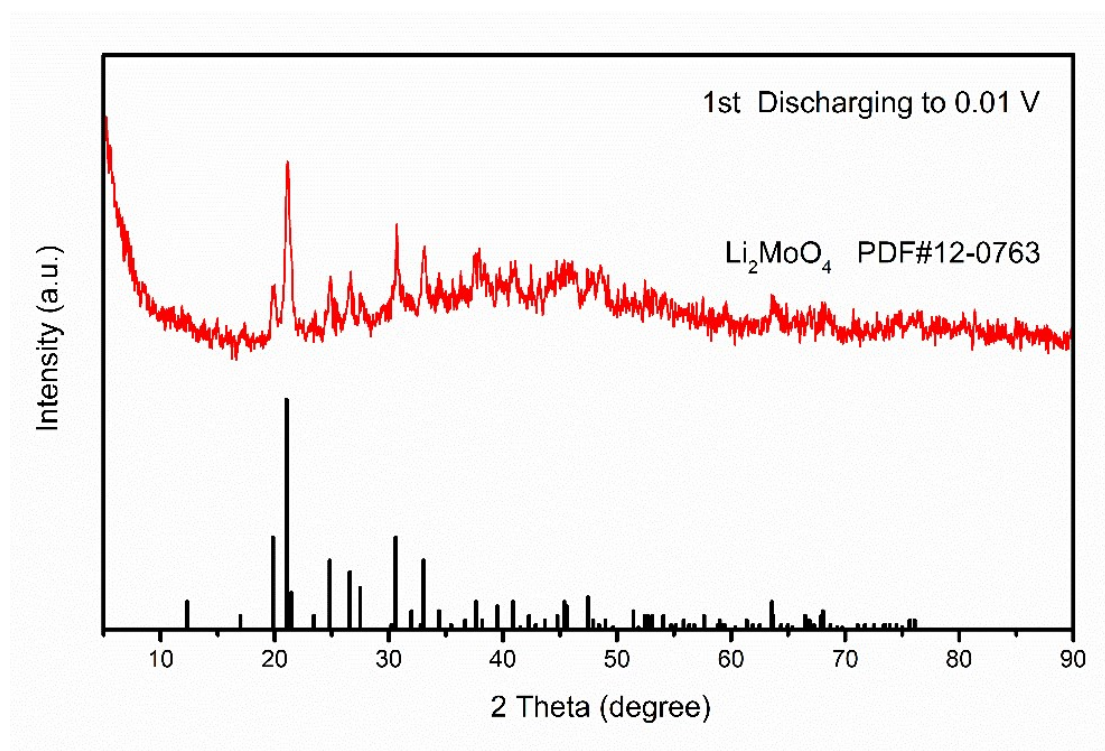

163

164 **Fig. S6** XRD pattern of  $\text{MoS}_2$  discharged to 0.01 V at  $0.1 \text{ mA cm}^{-2}$ .

165

166 **Stage g: 0.01-1.20 V**

167 As depicted in **Fig. S7**, the electrode was composed of  $\text{Li}_2\text{MoO}_4$  and  $\text{Li}_2\text{S}$  at the end of the  
168 discharging process. The characteristic peaks of  $\text{Li}_2\text{MoO}_4$  did not disappear when charging to 1.2  
169 V, indicating that  $\text{Li}_2\text{MoO}_4$  did not decompose at this stage. It could also be deduced from the

170 differential capacitance that there were no obvious characteristic peaks at this stage (Fig. S7).  
171 However, this stage could provide a charging capacity of approximately 230 mAh g<sup>-1</sup>. Additionally,  
172 this potential did not reach the oxidation potential of Li<sub>2</sub>S. This capacitance and potential had a  
173 linear relationship, which was very similar to the characteristics of the capacitor. [22]  
174

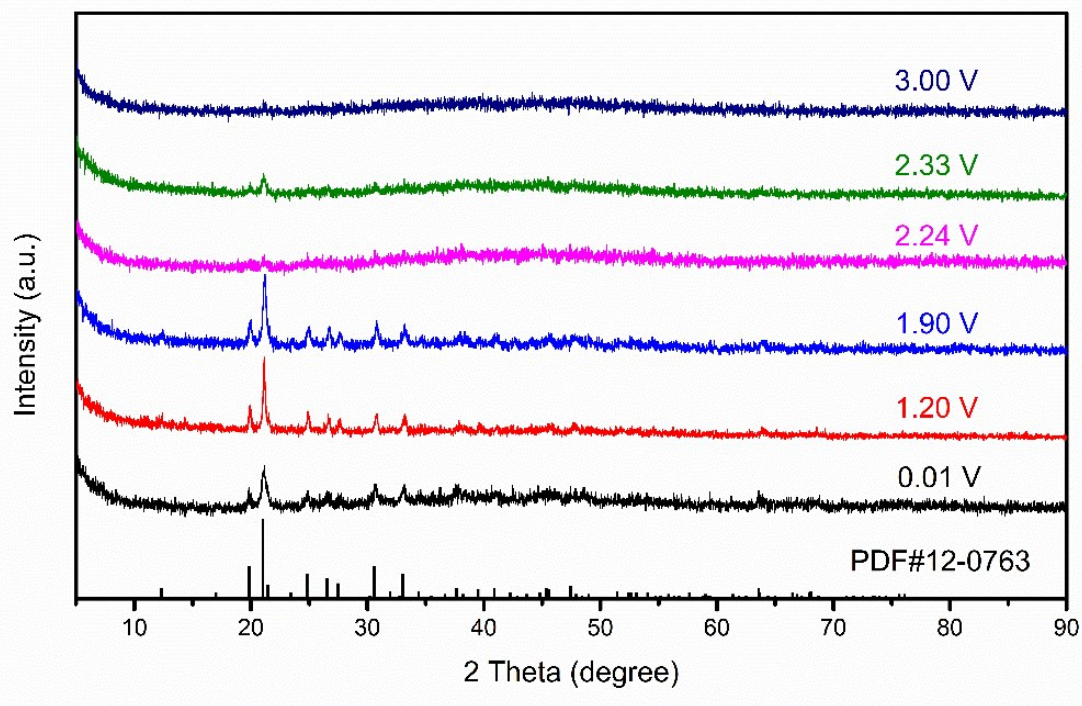

175

176 **Fig. S7** XRD patterns of MoS<sub>2</sub> in the first charging process at 0.1 mA cm<sup>-2</sup>.

177

178 **Stage h: 1.20-1.90 V**

179 When charging to 1.9 V, the characteristic peaks of Li<sub>2</sub>MoO<sub>4</sub> were still present (Fig. S7),  
180 demonstrating that Li<sub>2</sub>MoO<sub>4</sub> was not converted into other substances.

181

182 **Stage i: 1.90-2.24 V**

183 When charging to 2.24 V, the characteristic peaks of Li<sub>2</sub>MoO<sub>4</sub> disappeared completely, indicating  
184 that the reaction in this stage was the conversion reaction of Li<sub>2</sub>MoO<sub>4</sub>. In the differential capacitance  
185 curve shown in Fig. 3f, a strong oxidation peak could also be observed, which meant that the reaction  
186 was a phase change reaction. However, the XRD pattern did not indicate the identity of the Li<sub>2</sub>MoO<sub>4</sub>  
187 delithiation product, which may be due to the product being an amorphous substance.

188

189 **Stage j: 2.24-2.33 V**

190 When the potential of the electrode increased from 2.24 V to 2.33 V, no new diffraction peak  
191 appeared in the XRD pattern (Fig. S7), suggesting that no crystals of large particles were generated.

192

193 **Stage k: 2.33-3.00 V**

194 In the last stage of charging, no characteristic peak of MoS<sub>2</sub> was found in the XRD patterns,  
195 indicating that MoS<sub>2</sub> did not form after the first deep discharging process, which indicated once  
196 again that the reaction in the first cycle was an electrochemically irreversible process.

197

198

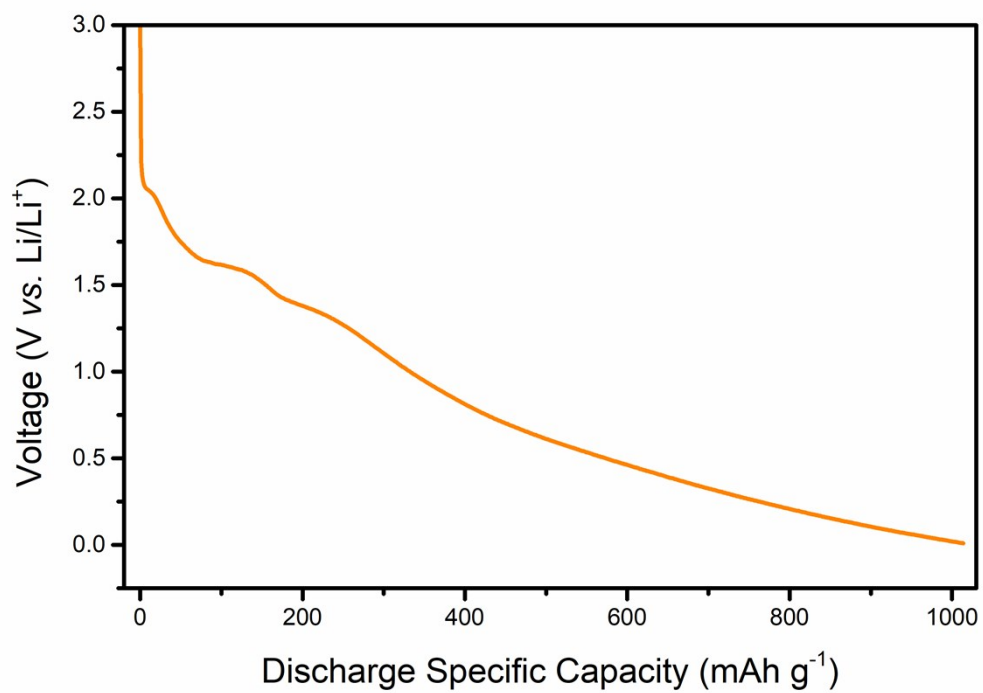

200

201 **Fig. S8** Second galvanostatic discharge curve of MoS<sub>2</sub> at 0.1 mA cm<sup>-2</sup> from 3.0 V to 0.01 V.

202

203

204

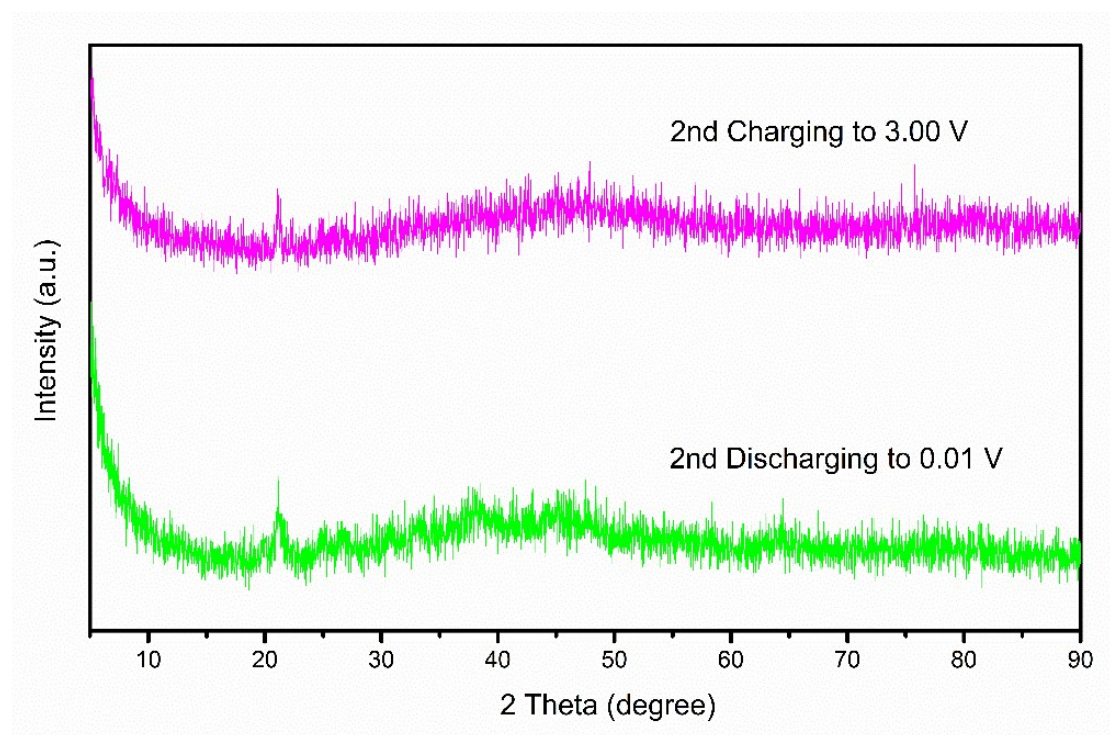

205

206 **Fig. S9** XRD patterns of MoS<sub>2</sub> discharged to 0.01 V for the second time and charged to 3.0 V for  
207 the second time at 0.1 mA cm<sup>-2</sup>.

208

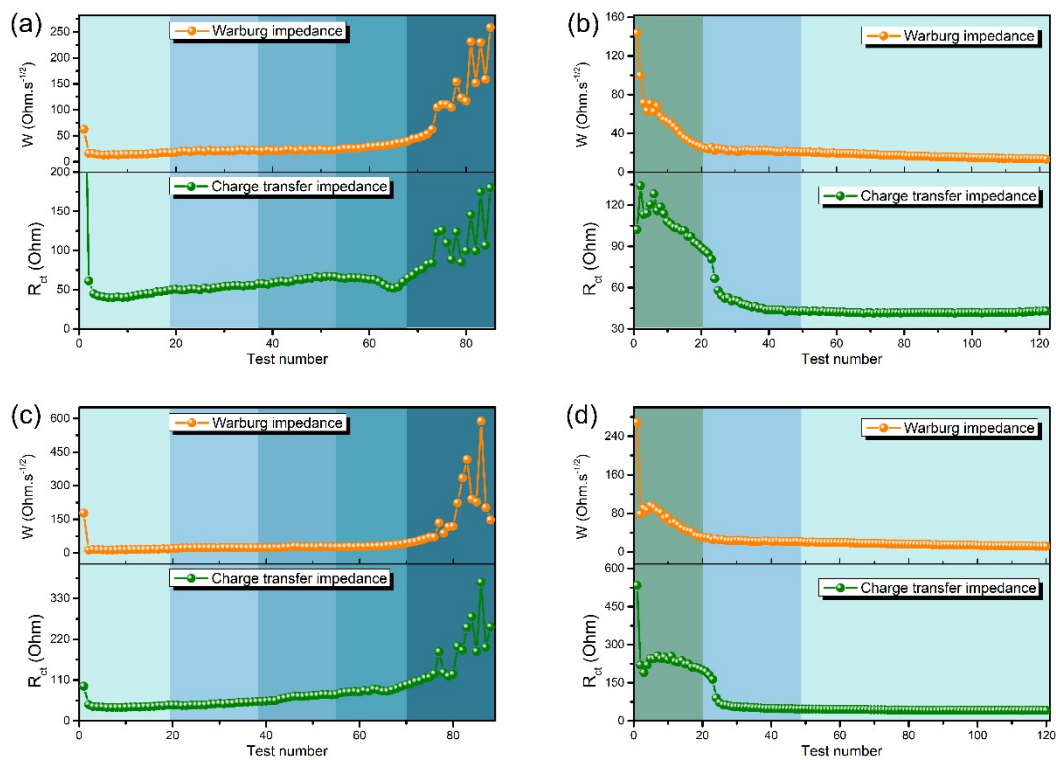

210

211 **Fig. S10** Impedances in the second (a) and third (c) charging processes and the third (b) and fourth212 (d) discharging processes at  $0.1 \text{ mA cm}^{-2}$ .

213

214

215 **References**

- 216 [1] N. Imanishi, M. Toyoda, Y. Takeda, O. Yamamoto, Study on lithium intercalation into MoS<sub>2</sub>,  
217 *Solid State Ionics*, 1992, 58, 333-338. [https://doi.org/10.1016/0167-2738\(92\)90137-E](https://doi.org/10.1016/0167-2738(92)90137-E)
- 218 [2] L. Wang, Z. Xu, W. Wang, X. Bai, Atomic mechanism of dynamic electrochemical lithiation  
219 processes of MoS<sub>2</sub> nanosheets, *J. Am. Chem. Soc.*, 2014, 136, 6693-6697.  
220 <https://doi.org/10.1021/ja501686w>
- 221 [3] T. Stephenson, Z. Li, B. Olsen, D. Mitlin, Lithium ion battery applications of molybdenum  
222 disulfide (MoS<sub>2</sub>) nanocomposites, *Energy Environ. Sci.*, 2014, 7, 209-231.  
223 <https://doi.org/10.1039/c3ee42591f>
- 224 [4] J. Gao, J. He, N. Wang, X. Li, Z. Yang, K. Wang, Y. Chen, Y. Zhang, C. Huang, Robust C-S  
225 bond integrated graphdiyne-MoS<sub>2</sub> nanohybrids for enhanced lithium storage capability, *Chem.*  
226 *Eng. J.*, 2019, 373, 660-667. <https://doi.org/10.1016/j.cej.2019.05.086>
- 227 [5] Q. Su, S. Wang, M. Feng, G. Du, B. Xu, Direct studies on the lithium-storage mechanism of  
228 molybdenum disulfide, *Sci. Rep.*, 2017, 7, 7275. <https://doi.org/10.1038/s41598-017-07648-0>
- 229 [6] Z. Zeng, X. Zhang, K. Bustillo, K. Niu, C. Gammer, J. Xu, H. Zheng, In situ study of lithiation  
230 and delithiation of MoS<sub>2</sub> nanosheets using electrochemical liquid cell transmission electron  
231 microscopy, *Nano Lett.*, 2015, 15, 5214-5220. <https://doi.org/10.1021/acs.nanolett.5b02483>
- 232 [7] L. Zhang, D. Sun, J. Kang, J. Feng, H.A. Bechtel, L.-W. Wang, E.J. Cairns, J. Guo,  
233 Electrochemical reaction mechanism of the MoS<sub>2</sub> electrode in a lithium-ion cell revealed by in  
234 situ and operando X-ray absorption spectroscopy, *Nano Lett.*, 2018, 18, 1466-1475.  
235 <https://doi.org/10.1021/acs.nanolett.7b05246>
- 236 [8] X. Fang, X. Guo, Y. Mao, C. Hua, L. Shen, Y. Hu, Z. Wang, F. Wu, L. Chen, Mechanism of  
237 lithium storage in MoS<sub>2</sub> and the feasibility of using Li<sub>2</sub>S/Mo nanocomposites as cathode  
238 materials for lithium-sulfur batteries, *Chem. Asian J.*, 2012, 7, 1013-1017.  
239 <https://doi.org/10.1002/asia.201100796>
- 240 [9] M. Wu, C. Liu, T. Ma, M. Tang, J. Shen, H. Ji, G. Yang, Heterostructural composite of few-  
241 layered MoS<sub>2</sub>/hexagonal MoO<sub>2</sub> particles/graphene as anode material for highly reversible  
242 lithium/sodium storage, *Int. J. Energy Res.*, 2020, 44, 518-527. <https://doi.org/10.1002/er.4963>
- 243 [10] X. Hong, R. Wang, Y. Liu, J. Fu, J. Liang, S. Dou, Recent advances in chemical adsorption  
244 and catalytic conversion materials for Li-S batteries, *J. Energy Chem.*, 2020, 42, 144-168.  
245 <https://doi.org/10.1016/j.jechem.2019.07.001>
- 246 [11] Q. Wang, J. Li, Facilitated lithium storage in MoS<sub>2</sub> overlayers supported on coaxial carbon  
247 nanotubes, *J. Phys. Chem. C*, 2007, 111, 1675-1682. <https://doi.org/10.1021/jp066655p>
- 248 [12] A. Enyashin, S. Gemming, G. Seifert, Nanosized allotropes of molybdenum disulfide, *Eur.*  
249 *Phys. J. Special Topics*, 2007, 149, 103-125. <https://doi.org/10.1140/epjst/e2007-00246-0>
- 250 [13] X. Qian, G. Zhu, K. Wang, F. Zhang, K. Liang, W. Luo, J. Yang, Bowl-like mesoporous  
251 polymer-induced interface growth of molybdenum disulfide for stable lithium storage, *Chem.*  
252 *Eng. J.*, 2020, 381, 122651. <https://doi.org/10.1016/j.cej.2019.122651>



- 253 [14] K. Chang, W. Chen, L-cysteine-assisted synthesis of layered MoS<sub>2</sub>/graphene composites with  
254 excellent electrochemical performances for lithium ion batteries, *ACS Nano*, 2011, 5, 4720-  
255 4728. <https://doi.org/10.1021/nn200659w>
- 256 [15] Z. Wang, T. Chen, W. Chen, K. Chang, L. Ma, G. Huang, D. Chen, J.Y. Lee, CTAB-assisted  
257 synthesis of single-layer MoS<sub>2</sub>-graphene composites as anode materials of Li-ion batteries, *J.*  
258 *Mater. Chem. A*, 2013, 1, 2202-2210. <https://doi.org/10.1039/c2ta00598k>
- 259 [16] J. Xu, Y. Xu, G. Tang, H. Tang, H. Jiang, The novel g-C<sub>3</sub>N<sub>4</sub>/MoS<sub>2</sub>/ZnS ternary nanocomposite  
260 with enhanced lithium storage properties, *Appl. Surf. Sci.*, 2019, 492, 37-44.  
261 <https://doi.org/10.1016/j.apsusc.2019.05.139>
- 262 [17] J. Zong, F. Wang, G. Liu, M. Zhao, S. Yang, X. Song, Ethylene glycol solvent induced  
263 expansion of interplanar spacing and 2H-1T phase transformation of molybdenum disulfide  
264 nanocomposites for enhanced lithium storage capability, *J. Alloy. Compd.*, 2019, 810, 151959.  
265 <https://doi.org/10.1016/j.jallcom.2019.151959>
- 266 [18] H. Xue, Q. Jiao, J. Du, S. Wang, C. Feng, Q. Wu, H. Li, Q. Lu, D. Shi, Y. Zhao, Hollow  
267 MoS<sub>2</sub>/rGO composites as high-performance anode materials for lithium-ion batteries, *Ionics*,  
268 2019, 25, 4659-4666. <https://doi.org/10.1007/s11581-019-03041-1>
- 269 [19] T. Hwang, J. Lee, J. Oh, J.M. Kim, Y. Jeon, S.-K. Park, Y. Piao, Facile synthesis of crumpled  
270 nitrogen-doped carbon/molybdenum disulfide hybrid sheets as high-rate anodes for lithium-  
271 ion batteries, *Electrochim. Acta*, 2019, 319, 596-605.  
272 <https://doi.org/10.1016/j.electacta.2019.07.018>
- 273 [20] S. Hu, W. Chen, J. Zhou, F. Yin, E. Uchaker, Q. Zhang, G. Cao, Preparation of carbon coated  
274 MoS<sub>2</sub> flower-like nanostructure with self-assembled nanosheets as high-performance lithium-  
275 ion battery anodes, *J. Mater. Chem. A*, 2014, 2, 7862-7872. <https://doi.org/10.1039/c4ta01247j>
- 276 [21] L. Wang, Q. Zhang, J. Zhu, X. Duan, Z. Xu, Y. Liu, H. Yang, B. Lu, Nature of extra capacity  
277 in MoS<sub>2</sub> electrodes: molybdenum atoms accommodate with lithium, *Energy Storage Mater.*,  
278 2019, 16, 37-45. <https://doi.org/10.1016/j.ensm.2018.04.025>
- 279 [22] Z. Du, S. Zhang, Y. Xing, X. Wu, Nanocone-arrays supported tin-based anode materials for  
280 lithium-ion battery, *J. Power Sources*, 2011, 196, 9780-9785.  
281 <https://doi.org/10.1016/j.jpowsour.2011.08.012>  
282  
283
